# Supplementary material
Source: publisher site journal article supplement (https://www.spandidos-publications.com/5095/downloadSupplementary)

Figure S1. Survival differences in the pure sarcomatoid carcinoma (100%) and mixed sarcomatoid carcinoma (1-99%) groups. (A) Cancer-specific survival. (B) Recurrence-free survival. (C) ROC curve for determining the cut-off value of sarcomatoid carcinoma proportion for prognostic prediction. ROC, receiver operating characteristic.

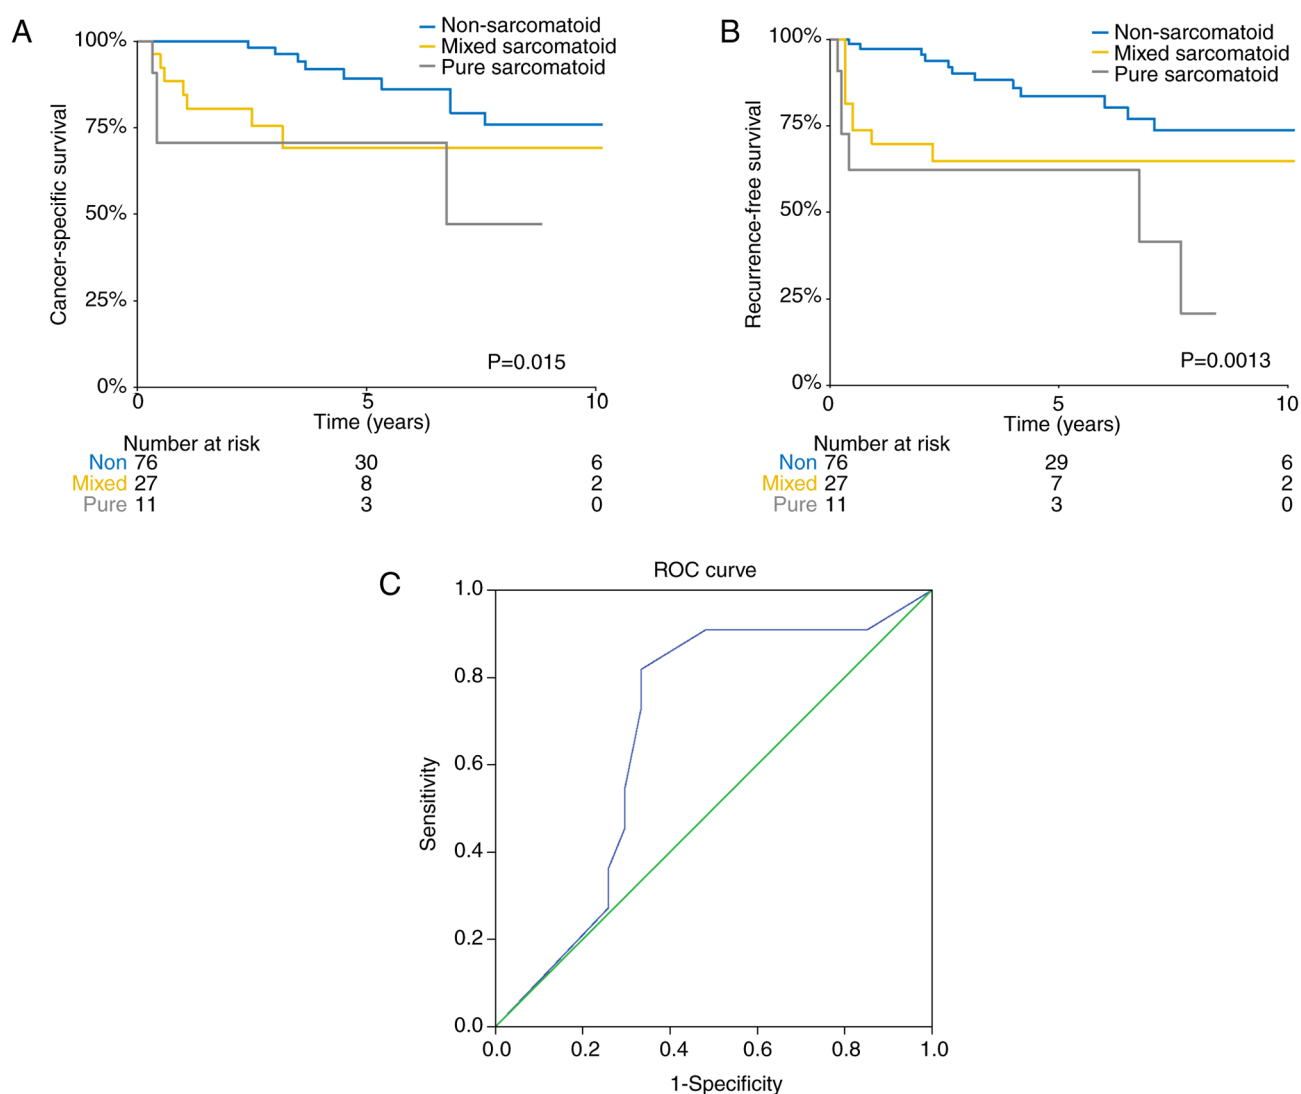

Supplement: Supplementary file 1 [file downloadSupplementary]
